# Supplementary material for: Chiral structure fluctuations predicted by a coarse-grained model of peptide aggregation
Source: Royal Society of Chemistry journal article supplement (doi:10.1039/d0sm00090f), 2020-01-01
Supplement: d0sm00090f1.pdf [file d0sm00090f1.pdf]

## Supporting Information

for

### Chiral Structure Fluctuations Predicted by a Coarse-Grained Model of Peptide Aggregation

Beata Szala,<sup>†</sup> Andrzej Molski<sup>‡</sup>

Adam Mickiewicz University in Poznań, Faculty of Chemistry,

Umultowska 89b, 61-614 Poznań, Poland

<sup>†</sup>beata.szala@amu.edu.pl, <sup>‡</sup>amolski@amu.edu.pl

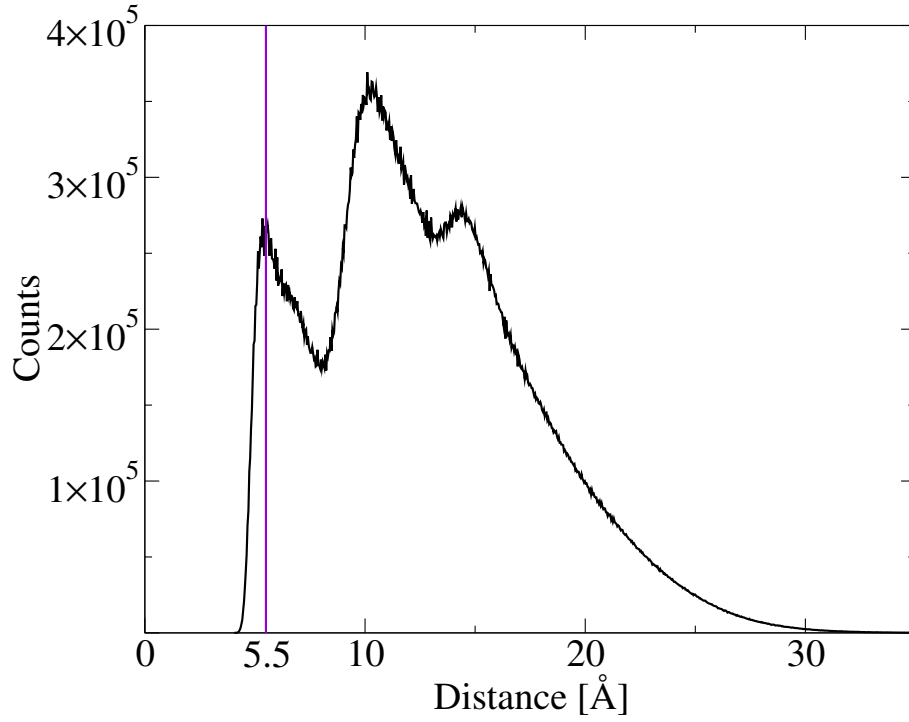

Figure S1: Example histogram of atom distances in all clusters for a simulation with  $N = 9$ ,  $\varepsilon = 2$  kJ/mol,  $k_\theta = 1000$  kJ/mol. The first maximum at  $5.5$  Å marked by a vertical line determines the cluster cut-off distance.

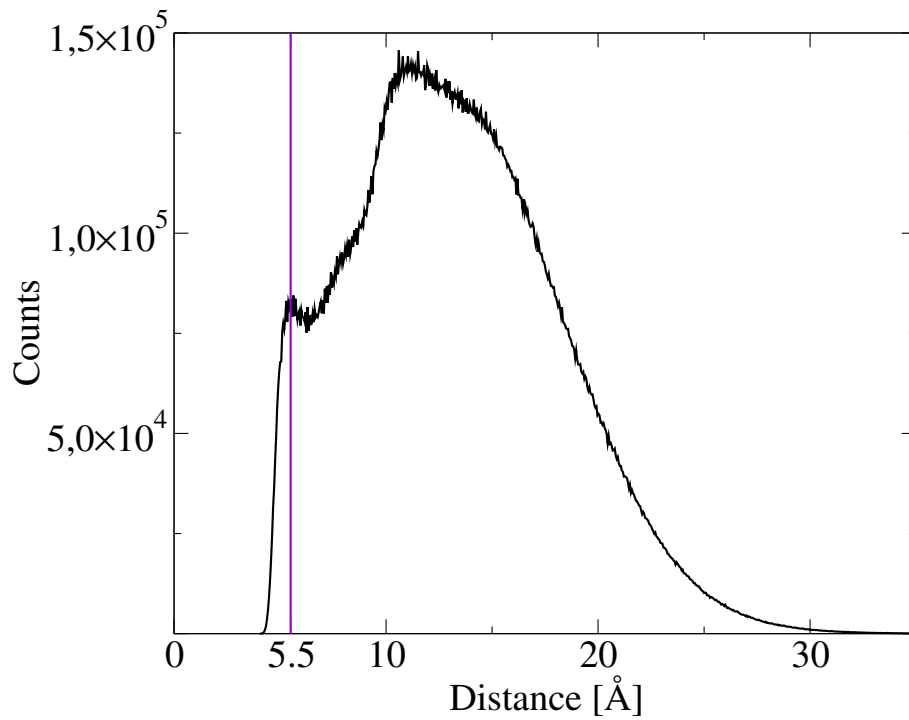

Figure S2: Example histogram of atom distances in all clusters for a simulation with  $N = 9$ ,  $\varepsilon = 2$  kJ/mol,  $k_\theta = 10$  kJ/mol. The first maximum at  $5.5$  Å marked by a vertical line determines the cluster cut-off distance.

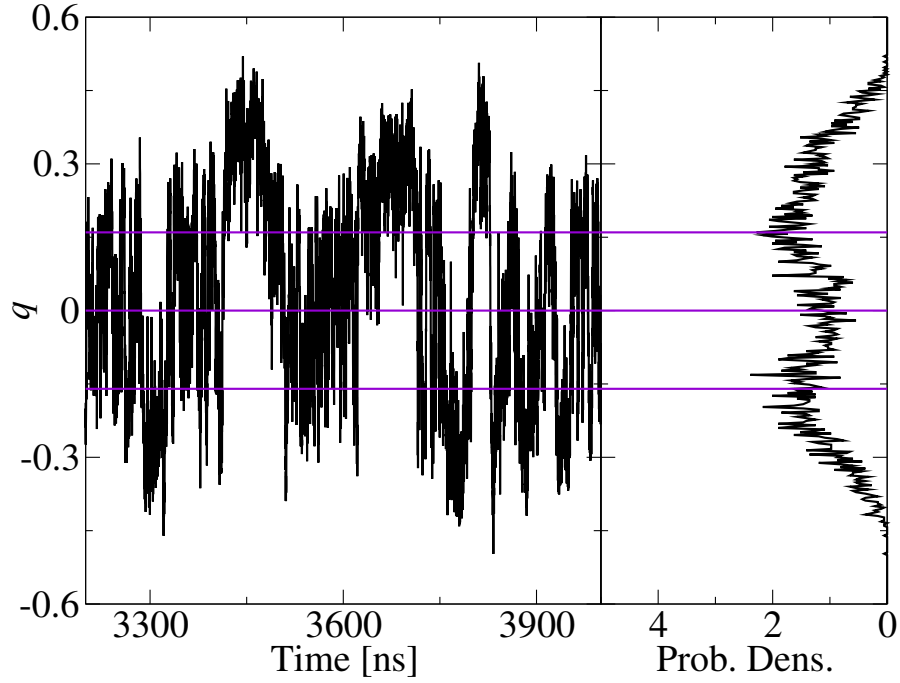

Figure S3: Cluster twist trajectory  $q(t)$  for an aggregate of size  $M = 41$ . The normalized trajectory histogram (estimated probability density) is presented on the right panel. Three maxima marked by violet lines are visible on the histogram at  $q \approx 0.16$ ,  $q \approx 0.0$ , and  $q \approx -0.16$ .

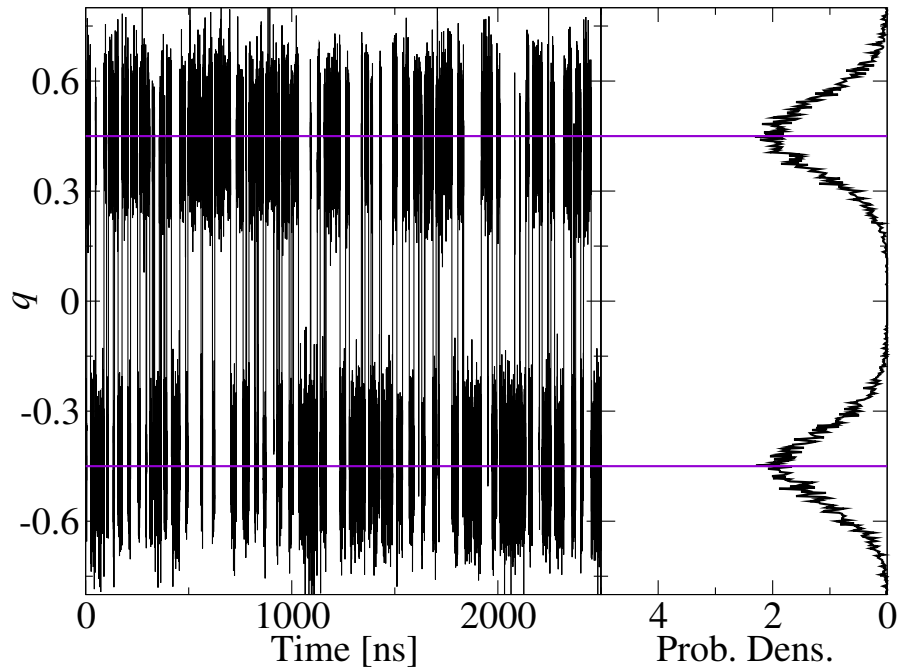

Figure S4: Cluster twist trajectory  $q(t)$  simulated by the stochastic diffusion model for an aggregate of size  $M = 20$ . The normalized trajectory histogram (estimated probability density) is presented on the right panel. Two maxima marked by violet lines are visible on the histogram at  $q \approx 0.45$  and  $q \approx -0.45$ .

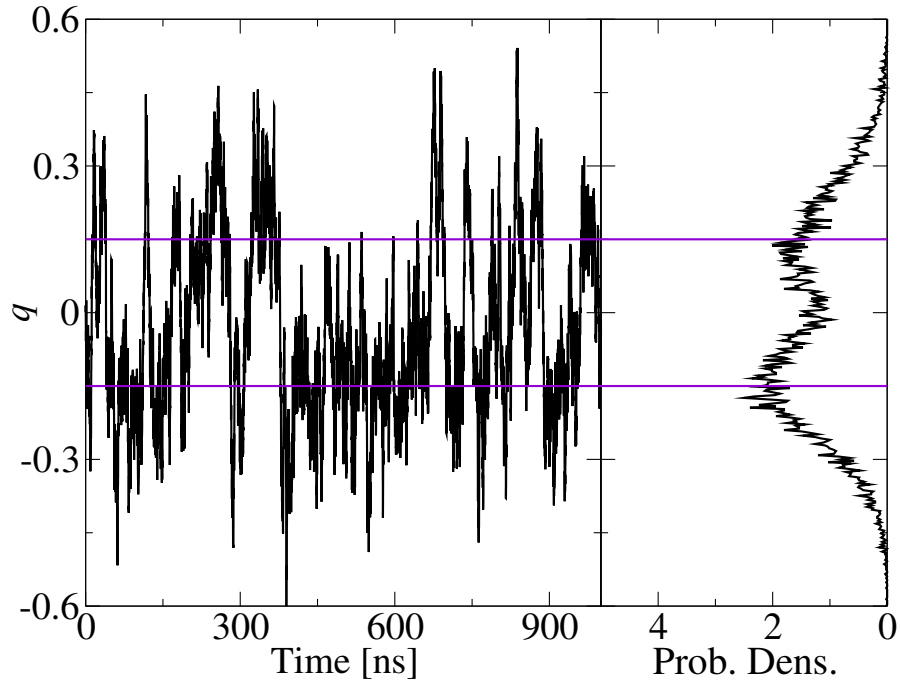

Figure S5: Cluster twist trajectory  $q(t)$  simulated by the stochastic diffusion model for an aggregate of size  $M = 41$ . Normalized histogram (estimated probability density) is presented on the right panel. Two maxima marked by violet lines are visible on the histogram at  $q \approx 0.15$  and  $-0.15$ .

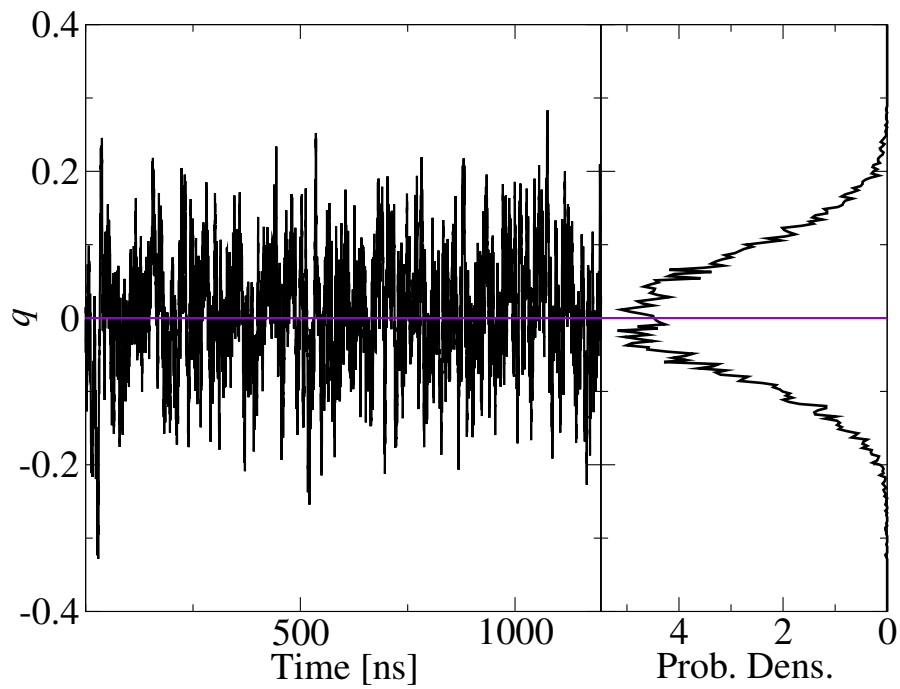

Figure S6: Cluster twist trajectory  $q(t)$  simulated by the stochastic diffusion model for an aggregate of size  $M = 68$ . Normalized histogram (estimated probability density) is presented on the right panel. The maximum marked by violet line is located at  $q \approx 0$ .

Table S1: The chain twist  $\cos(\tau) = (\mathbf{b} \times \mathbf{t}) \cdot \mathbf{A}$  for three cases: achiral, right and left-handed chain twists.

|                                                                                                        |                                                                                                                                                                                                                                         |
|--------------------------------------------------------------------------------------------------------|-----------------------------------------------------------------------------------------------------------------------------------------------------------------------------------------------------------------------------------------|
| <p>Achiral</p> 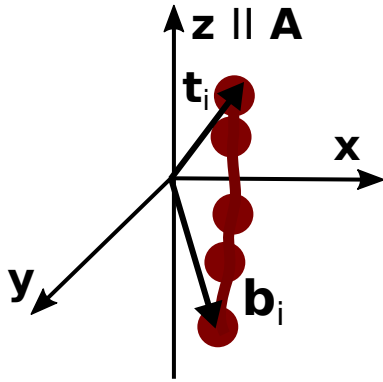       | $\mathbf{A} = (0, 0, 1)$ $t_x = b_x$ $t_y = b_y$ $t_z = -b_z$ $\mathbf{b} \times \mathbf{t} = (-2b_y b_z, 2b_x b_z, 0)$ $\cos(\tau) = (\mathbf{b} \times \mathbf{t}) \cdot \mathbf{A} = 0$                                              |
| <p>Right-handed</p>  | $\mathbf{A} = (0, 0, 1)$ $t_x = -b_x$ $t_y = b_y$ $t_z = -b_z$ $\mathbf{b} \times \mathbf{t} = (-2b_y b_z, 0, 2b_x b_y)$ $\cos(\tau) = (\mathbf{b} \times \mathbf{t}) \cdot \mathbf{A} = 2b_x b_y$ $b_y > 0; b_x < 0;$ $\cos(\tau) < 0$ |
| <p>Left-handed</p>  | $\mathbf{A} = (0, 0, 1)$ $t_x = -b_x$ $t_y = b_y$ $t_z = -b_z$ $\mathbf{b} \times \mathbf{t} = (-2b_y b_z, 0, 2b_x b_y)$ $\cos(\tau) = (\mathbf{b} \times \mathbf{t}) \cdot \mathbf{A} = 2b_x b_y$ $b_y > 0; b_x > 0;$ $\cos(\tau) > 0$ |
